# Supplementary material for: Synthetic Naphthofuranquinone Derivatives Are Effective in Eliminating Drug-Resistant Candida albicans in Hyphal, Biofilm, and Intracellular Forms: An Application for Skin-Infection Treatment
Source: PubMed Central journal article supplement (PMC7479094; doi:10.3389/fmicb.2020.02053), 2020-08-26
Supplement: Image_4.pdf [file Image_4.pdf]

# Suppl. Fig. 4

## (A) HaCaT HaCaT/TCH1140

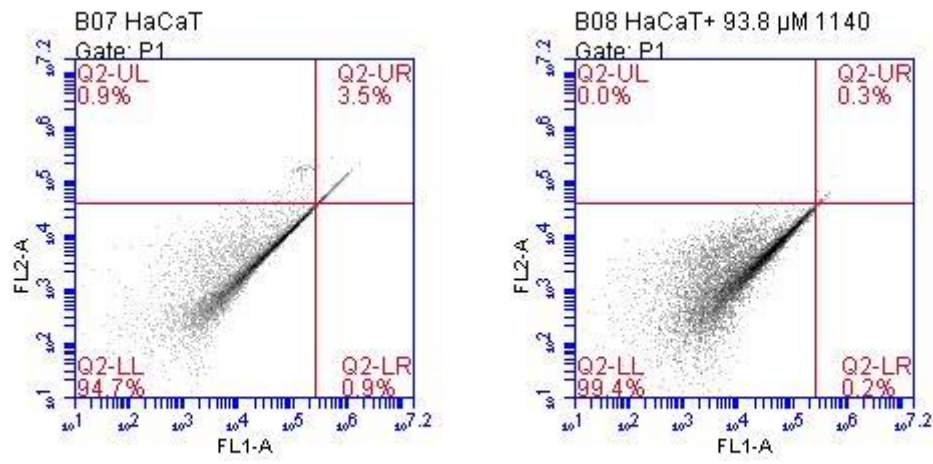

|         | LL       | LR      | UL      | UR      | UL+UR+LR |
|---------|----------|---------|---------|---------|----------|
| CTL     | 94.8±0.1 | 0.8±0.2 | 0.6±0.3 | 3.8±0.3 | 5.2±0.1  |
| TCH1140 | 99.5±0.1 | 0.2±0.0 | 0.1±0.1 | 0.2±0.1 | 0.5±0.1  |

## (B) HaCaT HaCaT/TCH1142

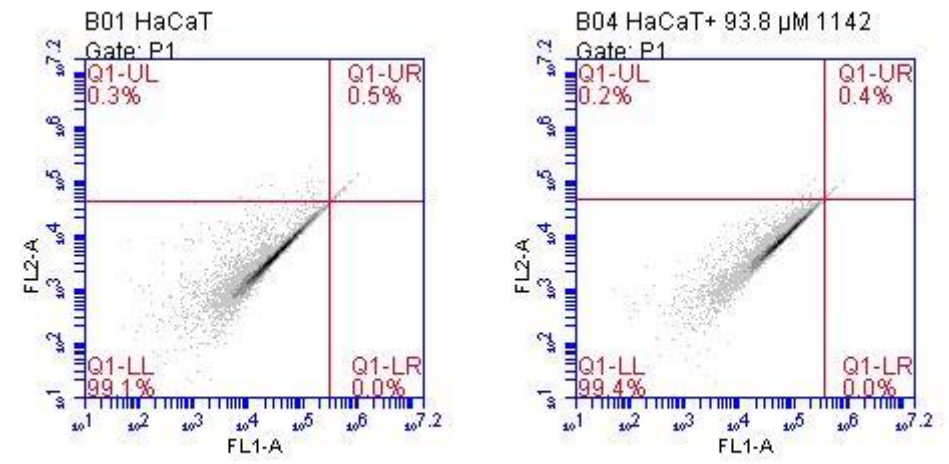

|         | LL       | LR      | UL      | UR      | UL+UR+LR |
|---------|----------|---------|---------|---------|----------|
| CTL     | 98.4±0.8 | 0.5±0.8 | 0.4±0.2 | 0.7±0.3 | 1.6±0.8  |
| TCH1142 | 99.5±0.3 | 0.1±0.1 | 0.2±0.2 | 0.2±0.2 | 0.4±0.4  |

## (C) ATCC90029 ATCC90029/TCH1140

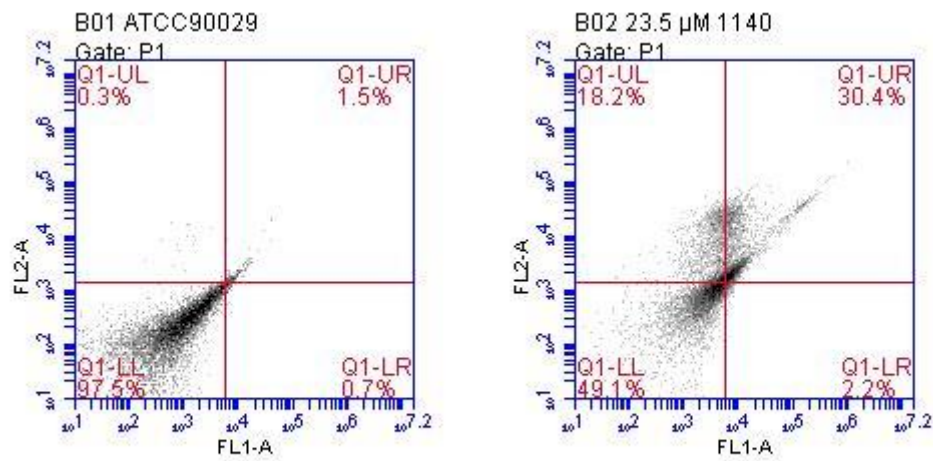

|         | LL        | LR      | UL       | UR        | UL+UR+LR  |
|---------|-----------|---------|----------|-----------|-----------|
| CTL     | 98.0±0.9  | 0.4±0.4 | 0.6±0.4  | 1.0±0.8   | 2.0±0.8   |
| TCH1140 | 47.3±18.7 | 2.3±0.8 | 16.4±8.9 | 34.0±26.8 | 52.7±18.7 |

## (D) ATCC10231 ATCC10231/TCH1140

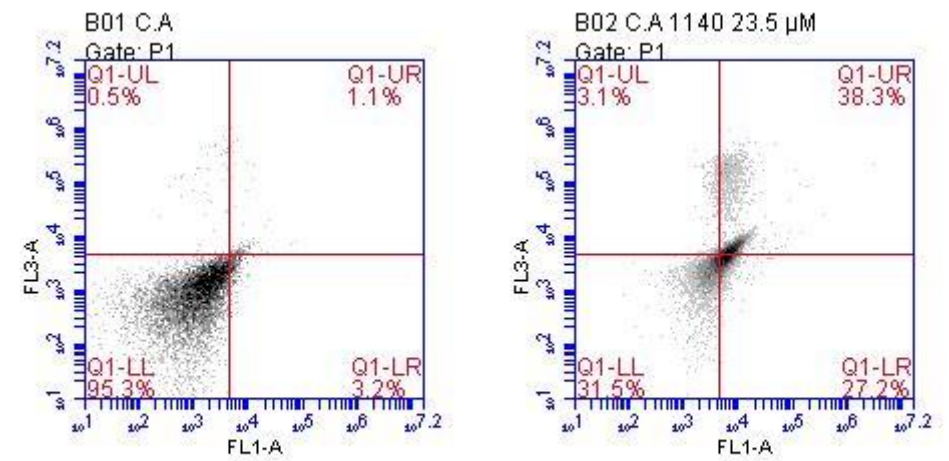

|         | LL        | LR      | UL      | UR        | UL+UR+LR  |
|---------|-----------|---------|---------|-----------|-----------|
| CTL     | 98.9±0.4  | 0.4±0.7 | 0.7±0.4 | 0.6±0.5   | 1.8±1.5   |
| TCH1140 | 54.5±19.5 | 4.5±3.8 | 9.1±5.1 | 31.9±20.4 | 45.4±19.4 |

## (E) ATCC90029 ATCC90029/TCH1142

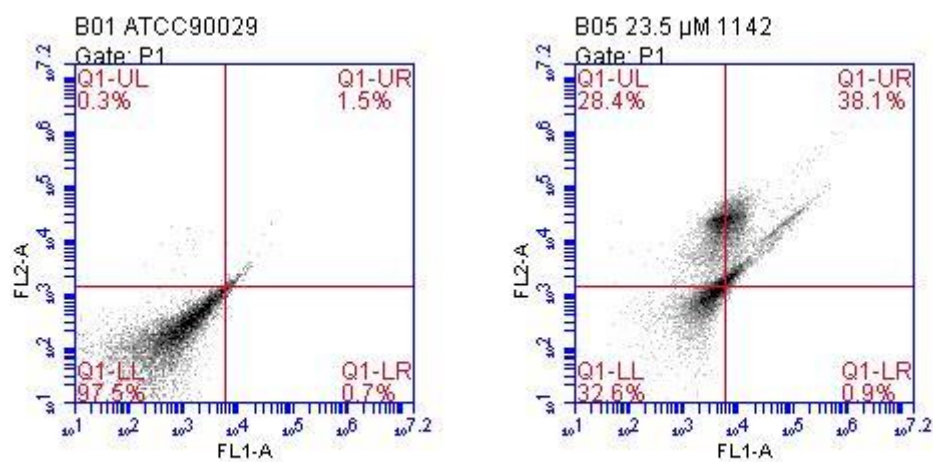

|         | LL        | LR      | UL       | UR        | UL+UR+LR  |
|---------|-----------|---------|----------|-----------|-----------|
| CTL     | 98.0±0.9  | 0.4±0.4 | 0.6±0.4  | 1.0±0.8   | 2.0±0.8   |
| TCH1142 | 45.3±23.1 | 2.3±1.8 | 19.2±8.6 | 33.2±22.7 | 54.7±23.0 |

## (F) ATCC10231 ATCC10231/TCH1142

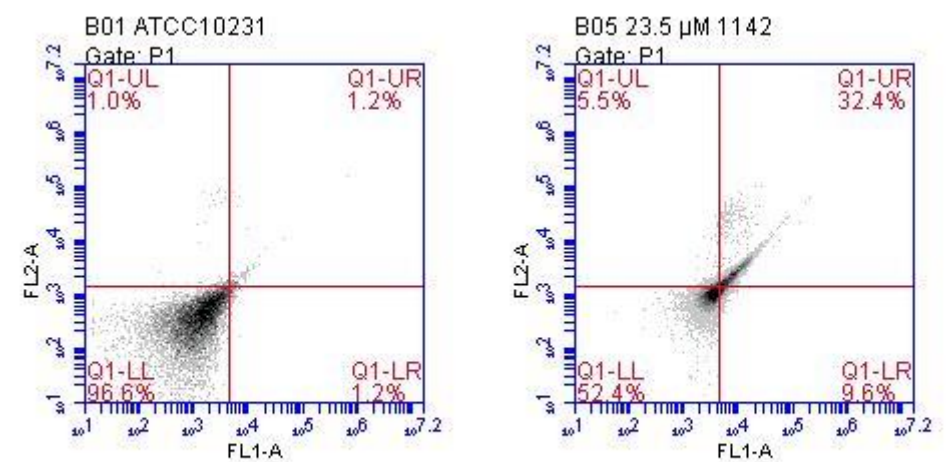

|         | LL       | LR      | UL      | UR       | UL+UR+LR |
|---------|----------|---------|---------|----------|----------|
| CTL     | 98.9±0.4 | 0.4±0.7 | 0.7±0.4 | 0.6±0.5  | 1.8±1.5  |
| TCH1142 | 61.6±7.9 | 4.7±4.4 | 8.7±2.9 | 25.0±6.7 | 38.4±7.9 |
