# Supplementary material for: Synthetic Naphthofuranquinone Derivatives Are Effective in Eliminating Drug-Resistant Candida albicans in Hyphal, Biofilm, and Intracellular Forms: An Application for Skin-Infection Treatment
Source: PubMed Central journal article supplement (PMC7479094; doi:10.3389/fmicb.2020.02053), 2020-08-26

Suppl. Fig. 5

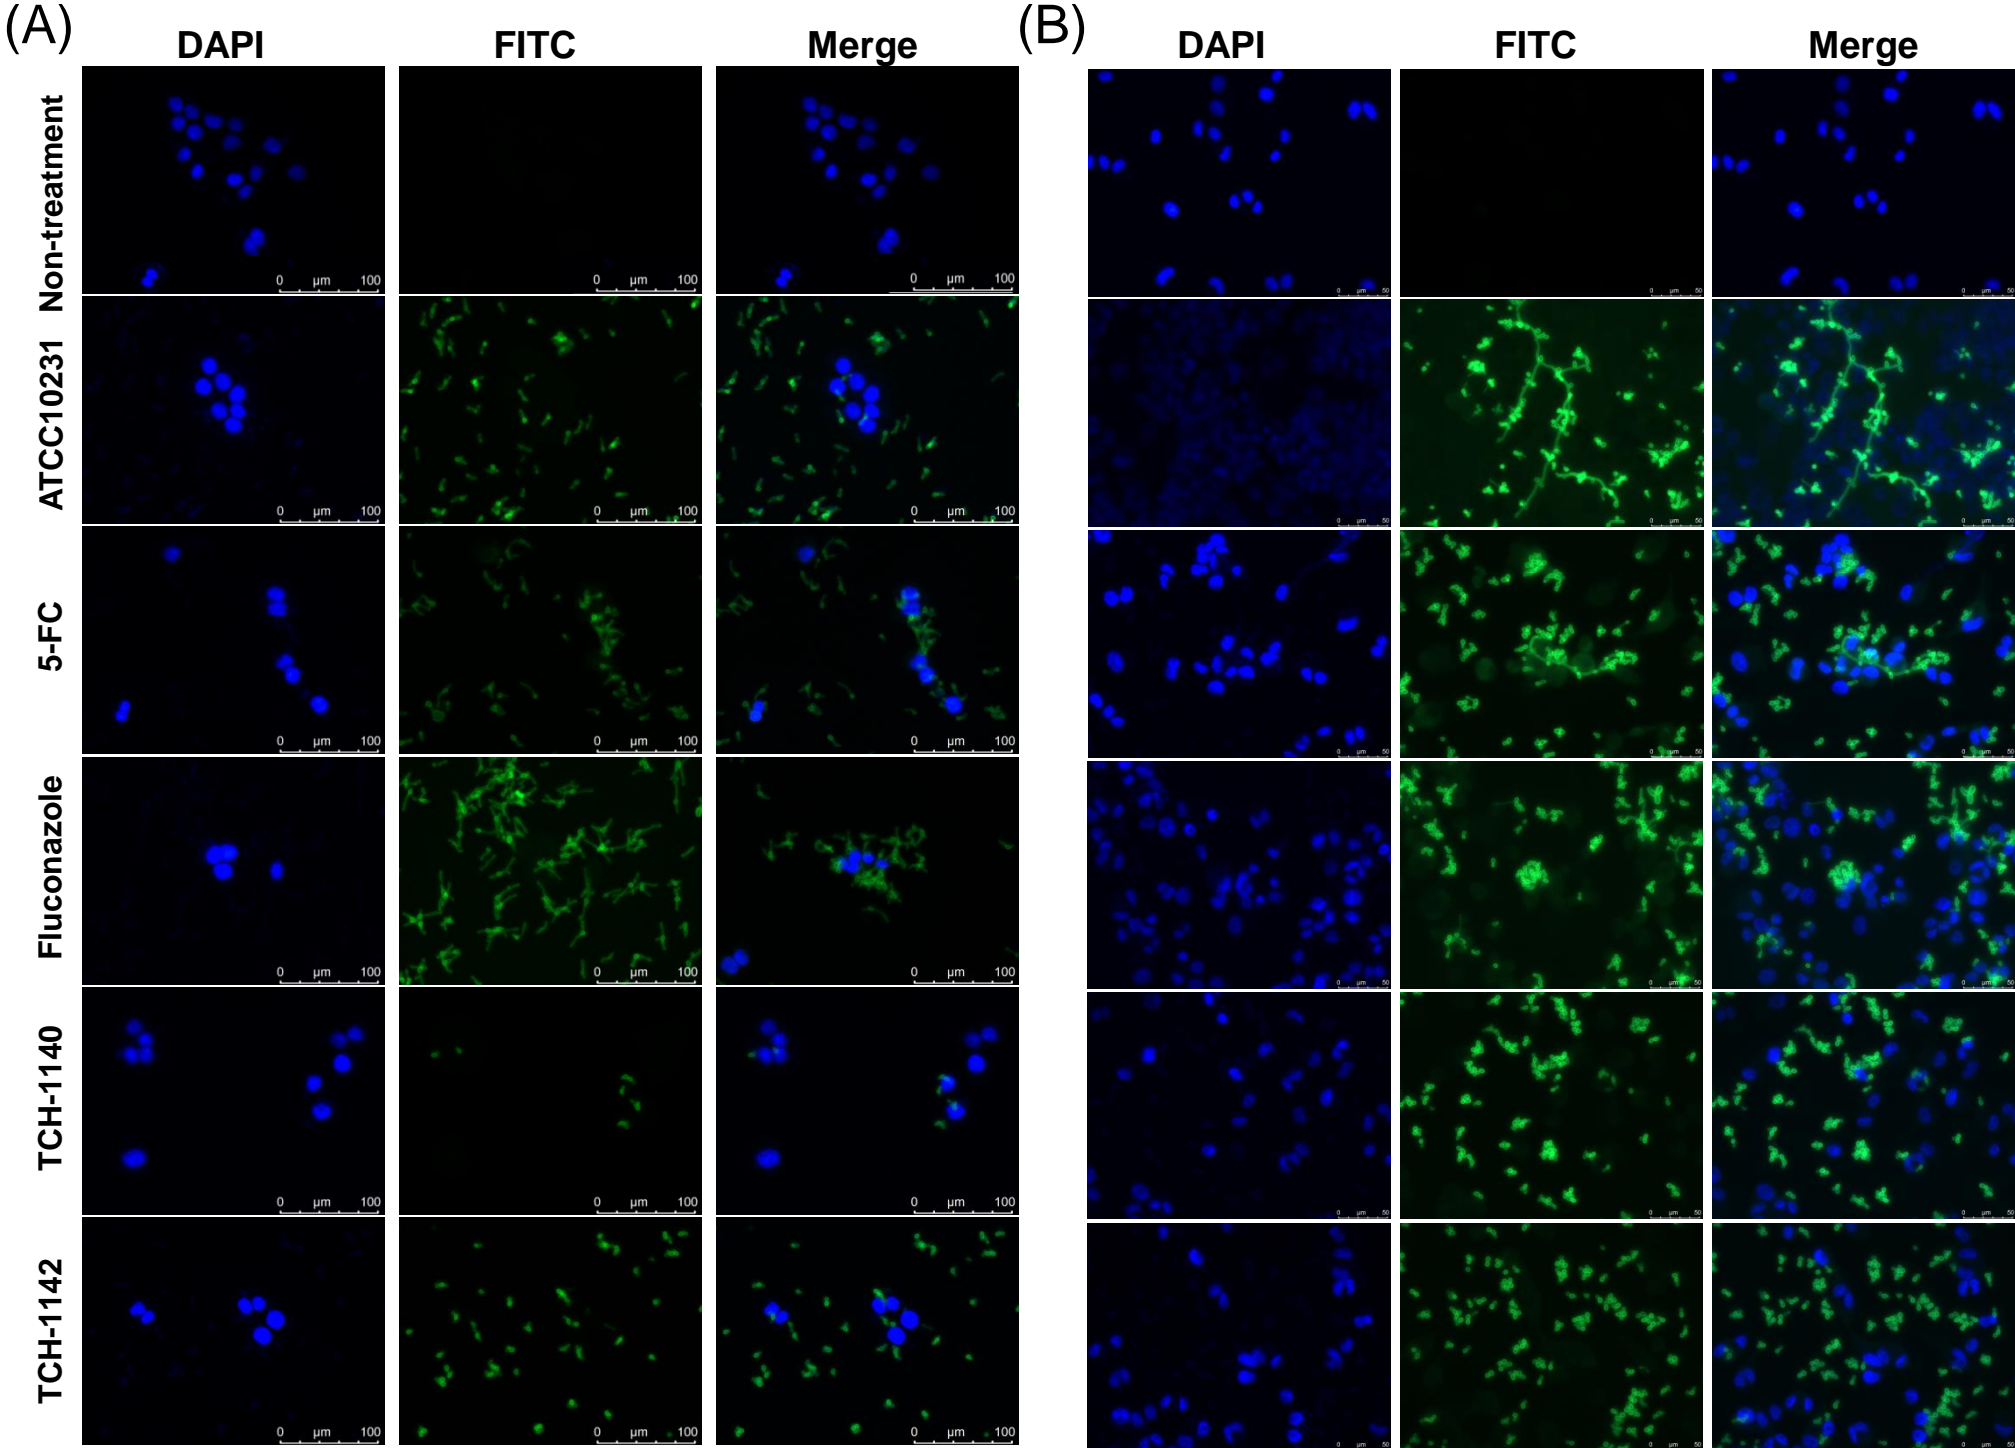

Supplement: Image_5.pdf [file Image_5.pdf]
