# Supplementary material for: Synthetic Naphthofuranquinone Derivatives Are Effective in Eliminating Drug-Resistant Candida albicans in Hyphal, Biofilm, and Intracellular Forms: An Application for Skin-Infection Treatment
Source: PubMed Central journal article supplement (PMC7479094; doi:10.3389/fmicb.2020.02053), 2020-08-26
Supplement: Table_1.pdf [file Table_1.pdf]

Suppl. Table 1. The MFC of naphthofuranquinones against ATCC10231

| Compounds | Structure                                                                           | MFC ( $\mu\text{M}$ ) |
|-----------|-------------------------------------------------------------------------------------|-----------------------|
| TCH-1139  | 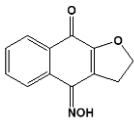   | 1465.8                |
| TCH-1140  |    | 2.9                   |
| TCH-1142  |    | 2.4                   |
| TCH-1181  |    | 5501.3                |
| TCH-1182  |    | 2167.9                |
| TCH-1187  |    | 2458.3                |
| TCH-1190  |   | 2040.6                |
| TCH-1198  |  | 4121.2                |
| TCH-1199  |  | 1030.3                |
| TCH-2958  |  | 268.2                 |
| TCH-5261  |  | 245.4                 |
| TCH-5262  |  | 2067.3                |
| TCH-5263  |  | 2040.6                |
| TCH-5264  |  | 1963.4                |

MFC, minimum fungicidal concentration.

Each value represents the 3 replicates.
